# Supplementary material for: SARS-CoV-2 Surveillance in Hospital Wastewater: CLEIA vs. RT-qPCR
Source: MDPI journal article supplement (doi:10.3390/w15132495), 2023-07-07
Supplement: s1 [file s1]

## Supplementary figure legend

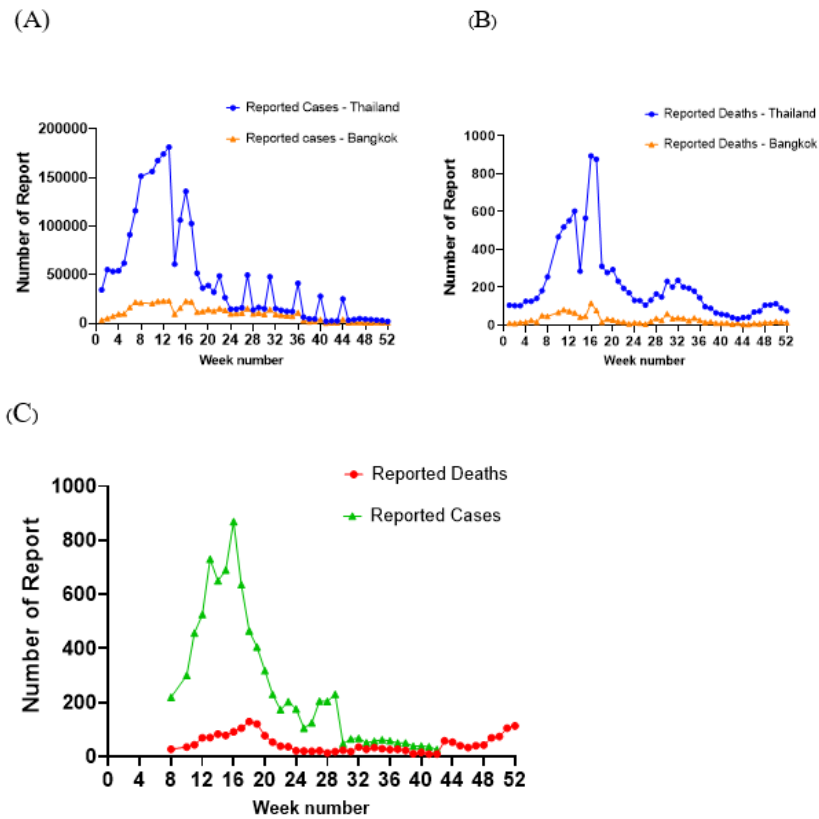

**Supplementary Figure S1:** Number of reported cases and deaths. The weekly reported number of cases (1A) and deaths (1B) in Thailand (blue) and Bangkok (orange) from January to December 2022. Data are from the Department of Disease Control (<https://covid19.ddc.moph.go.th>). (C) Number of weekly reported cases (green) and deaths (red) in Ramathibodi Hospital during the wastewater collection period of February to December 2022

The government's policy of relaxing COVID-19 regulations and not controlling public meetings or festivals may result in widespread transmission of SARS-CoV-2 [1]. If untreated, highly contaminated hospital wastewater may trigger fecal-oral and fecal-respiratory transmission of infectious diseases to the community, increasing environmental exposure [2,3]. The Faculty of Medicine Ramathibodi Hospital, Mahidol

University admitted its first COVID-19 case on March 12, 2020. Since then, the number of new cases and deaths had been continually reported until October 2022, at which point Thailand relaxed its COVID-19 restrictions [4], and the number of confirmed cases is no longer disclosed. The number of new cases peaked in early May 2022, related to the Chinese New Year (in early February) and the Songkran Festival (in mid-April). The number of reported cases over the previous 1-2 weeks correlated with the number of confirmed deaths.

1. Zhao, L.; Zou, Y.; David, R.E.; Withington, S.; McFarlane, S.; Faust, R.A.; Norton, J.; Xagorarakis, I. Simple methods for early warnings of COVID-19 surges: Lessons learned from 21 months of wastewater and clinical data collection in Detroit, Michigan, United States. *The Science of the total environment* **2023**, *864*, 161152, doi:10.1016/j.scitotenv.2022.161152.
2. Amin, N.; Haque, R.; Rahman, M.Z.; Rahman, M.Z.; Mahmud, Z.H.; Hasan, R.; Islam, M.T.; Sarker, P.; Sarker, S.; Adnan, S.D.; et al. Dependency of sanitation infrastructure on the discharge of faecal coliform and SARS-CoV-2 viral RNA in wastewater from COVID and non-COVID hospitals in Dhaka, Bangladesh. *The Science of the total environment* **2023**, *867*, 161424, doi:10.1016/j.scitotenv.2023.161424.
3. Núñez-Delgado, A.; Bontempi, E.; Coccia, M.; Kumar, M.; Farkas, K.; Domingo, J.L. SARS-CoV-2 and other pathogenic microorganisms in the environment. *Environ Res* **2021**, *201*, 111606, doi:10.1016/j.envres.2021.111606.
4. Available online: <https://www.thaiembassy.com/travel-to-thailand/thailand-travel-restrictions> (accessed on 21 February 2023).
